# Supplementary material for: Reactive oxygen species-dependent Toll/NF-κB activation in the Drosophila hematopoietic niche confers resistance to wasp parasitism
Source: eLife journal article supplement (doi:10.7554/elife.25496), 2017-10-30
Supplement: supp [file elife-25496-supp-v1.zip]

Archive with 36 entries (36 files):
- elife_poa_e25496_Figure_6_figure_supplement_1.pdf
- elife_poa_e25496_Figure_5_source_data_1.xlsx
- elife_poa_e25496_Figure_6_source_data_4.xlsx
- elife_poa_e25496_Figure5_figure_supplement_1_source_data_2.xlsx
- elife_poa_e25496_Figure_1_source_data_1.xlsx
- elife_poa_e25496_Figure_4_source_data_2.xlsx
- elife_poa_e25496_Figure_3_figure_supplement_1.pdf
- elife_poa_e25496_Figure_4_figure_supplement_1.pdf
- elife_poa_e25496_Figure_2_source_data_4.xlsx
- elife_poa_e25496_Figure_5_source_data_2.xlsx
- elife_poa_e25496_Figure_7_source_data_1.xlsx
- elife_poa_e25496_Figure_7_source_data_2.xlsx
- elife_poa_e25496_Figure_1_figure_supplement_1.pdf
- elife_poa_e25496_Figure_6_source_data_3.xlsx
- elife_poa_e25496_Transparent_Reporting_File.pdf
- elife_poa_e25496_Figure_5_figure_supplement_1.pdf
- elife_poa_e25496_Figure_6_figure_supplement_3.pdf
- elife_poa_e25496_Figure_4_source_data_1.xlsx
- elife_poa_e25496_Figure_3_source_data_1.xlsx
- elife_poa_e25496_Figure_5_figure_supplement_1_source_data_1.xlsx
- elife_poa_e25496_Figure_2_source_data_1.xlsx
- elife_poa_e25496_Figure2_figure_supplement_1_source_data_1.xlsx
- elife_poa_e25496_Figure_6_figure_supplement_2.pdf
- elife_poa_e25496_Figure_6_source_data_1.xlsx
- elife_poa_e25496_Figure_2_figure_supplement_1.pdf
- elife_poa_e25496_Figure_2_source_data_2.xlsx
- elife_poa_e25496_Figure_1_figure_supplement_1_source_data_1.xlsx
- elife_poa_e25496_Figure_7_source_data_3.xlsx
- elife_poa_e25496_Figure_6_source_data_2.xlsx
- elife_poa_e25496_Figure_4_figure_supplement_2.pdf
- elife_poa_e25496_Figure_2_figure_supplement_2.pdf
- elife_poa_e25496_Figure_2_source_data_3.xlsx
- elife_poa_e25496_Figure_5_source_data_3.xlsx
- elife_poa_e25496_Figure4_figure_supplement_1_source_data_1.xlsx
- elife_poa_e25496_Figure_3_source_data_2.xlsx
- elife_poa_e25496_Figure_6_source_data_5.xlsx
