# Supplementary material for: Reactive oxygen species-dependent Toll/NF-κB activation in the Drosophila hematopoietic niche confers resistance to wasp parasitism
Source: eLife journal article supplement (doi:10.7554/elife.25496), 2017-10-30
Supplement: supp [file elife-25496-supp-v1.zip › elife_poa_e25496_Figure2_figure_supplement_1_source_data_1.xlsx]

## Sheet: Feuil1
Wasp egg hatching (%)
		wt 1118 iso	Dif1 iso	dl1 iso	Tlrv1/Tlr iso	pll2/pll21 iso
		62	83	55	82	81
		64.7	93	38	92	100
		69	76	33		87
		77	66	64
		80	88	50
		59	90
		60	87
	Mean	67.39	83.29	48	87	89
	SEM	3.14	3.54	5.63	5	5.6
