# Supplementary material for: Reactive oxygen species-dependent Toll/NF-κB activation in the Drosophila hematopoietic niche confers resistance to wasp parasitism
Source: eLife journal article supplement (doi:10.7554/elife.25496), 2017-10-30
Supplement: supp [file elife-25496-supp-v1.zip › elife_poa_e25496_Figure4_figure_supplement_1_source_data_1.xlsx]

## Sheet: Feuil1
	disrupted	SEM	disrupting	SEM	Intact	SEM
col>wt	80.41	2.4	10.9	2.1	8.4	4.5
col>cact; Dif RNAi	23.92	4.55	42.9	14.8	33.06	15.4
antp>wt	72.3	6.1	27.6	6.1	0	0
antp>cactus>Dif RNAi	26.54	3.7	62.43	2.22	11.04	1.7
dome>WT	48	10	19	0.8	32	9
dome>Myd88 RNAi	61	12	29	13	9	2.6
dome>wt	37	13.5	41.5	1.5	21.5	11.5
dome>cact>Dif RNAi	47	7.5	18.5	12	33.5	6.5
