# Supplementary material for: Reactive oxygen species-dependent Toll/NF-κB activation in the Drosophila hematopoietic niche confers resistance to wasp parasitism
Source: eLife journal article supplement (doi:10.7554/elife.25496), 2017-10-30
Supplement: supp [file elife-25496-supp-v1.zip › elife_poa_e25496_Figure5_figure_supplement_1_source_data_2.xlsx]

## Sheet: Feuil1
LG	dispersed (%)		dispersing		Intact
wt	75		25		0
	54		23		23
	67		33		0
	62.5		37.5		0
	47		33		20
Mean (%)	61.1		30.3		8.6
SEM	4.9		2.7		5.3
Psh1	12		19		69
	24		13		63
	37.5		62.5		0
	38.5		61.5		0
	0		67		33
Mean (%)	22.4		44.6		33
SEM	7.4		11.7		14.8
