# Supplementary material for: Reactive oxygen species-dependent Toll/NF-κB activation in the Drosophila hematopoietic niche confers resistance to wasp parasitism
Source: eLife journal article supplement (doi:10.7554/elife.25496), 2017-10-30
Supplement: supp [file elife-25496-supp-v1.zip › elife_poa_e25496_Figure_1_figure_supplement_1_source_data_1.xlsx]

## Sheet: Feuil1
	Disrupted		Disrupting		Intact
	Mean	SEM	Mean	SEM	Mean	SEM
+/J4	20.28	4.7	64.62	5.7	15.1	7.5
dl1/J4	28.41	0.96	67.14	3.6	4.44	4
dif1/J4	0	0	60	1	40	1
	Disrupted		Disrupting		Intact
	Mean	SEM	Mean	SEM	Mean	SEM
w1118iso	77.26	4.8	20.12	4.3	2.62	1.9
dl1	95.56	4.44	4.44	4.44	0	0
dif1	17	4.5	33.97	4.6	49.03	8.4
