# Supplementary material for: Reactive oxygen species-dependent Toll/NF-κB activation in the Drosophila hematopoietic niche confers resistance to wasp parasitism
Source: eLife journal article supplement (doi:10.7554/elife.25496), 2017-10-30
Supplement: supp [file elife-25496-supp-v1.zip › elife_poa_e25496_Figure_1_source_data_1.xlsx]

## Sheet: Feuil1
	dispersed		dispersing		intact
	Mean	SEM	Mean	SEM	Mean	SEM
wt	93.44	4.7	6.56	4.7	0	0
pll2/pll7	0	0	2.08	2.083	97.92	2.083
wt	83.71	2.5	12.44	1.95	3.85	3.845
Dif1	1.79	1.785	43.04	8.79	55.17	7.95
wt	73.33	6.67	23.33	3	3.33	3
dl1	88.89	14.81	0	0	11.11	2
