# Supplementary material for: Reactive oxygen species-dependent Toll/NF-κB activation in the Drosophila hematopoietic niche confers resistance to wasp parasitism
Source: eLife journal article supplement (doi:10.7554/elife.25496), 2017-10-30
Supplement: supp [file elife-25496-supp-v1.zip › elife_poa_e25496_Figure_2_source_data_1.xlsx]

## Sheet: Feuil1
Wasp egg hatching
col>	SEM		dif1	SEM
30	3.95		100	0.2
25			100
16			100
25			100
0			99
29
25
