# Supplementary material for: Reactive oxygen species-dependent Toll/NF-κB activation in the Drosophila hematopoietic niche confers resistance to wasp parasitism
Source: eLife journal article supplement (doi:10.7554/elife.25496), 2017-10-30
Supplement: supp [file elife-25496-supp-v1.zip › elife_poa_e25496_Figure_2_source_data_2.xlsx]

## Sheet: Feuil1
hml>	plasmatocytes (%)	n	lamellocytes (%)	n	n (total)
Prior LG disruption	96	546	4	23	569
	95	271	5	15	286
	94	495	6	29	524
	90	101	10	11	112
	88	233	12	31	264
Total:		1646		109	1755
Mean	92.6		7.4
After LG disruption	49	416	51	435	851
	46	193	54	230	423
	46	121	54	141	262
	36	121	64	216	337
	58	414	42	302	716
	42	88	58	122	210
Total:		1353		1446	2799
mean	46.1667		53.8333
Dif1
prior LG disruption	85.5	65	14.5	11	76
	82	46	18	10	56
	95	114	5	6	120
	96	132	4	6	138
Total		357		33	390
Mean	89.625		10.375
After LG disruption	51	352	49	334	686
	50.4	302	49.6	297	599
	44	181	56	229	410
Total:		835		860	1695
mean	48.4667		51.5333
