# Supplementary material for: Reactive oxygen species-dependent Toll/NF-κB activation in the Drosophila hematopoietic niche confers resistance to wasp parasitism
Source: eLife journal article supplement (doi:10.7554/elife.25496), 2017-10-30
Supplement: supp [file elife-25496-supp-v1.zip › elife_poa_e25496_Figure_2_source_data_3.xlsx]

## Sheet: Feuil1
	Disrupted			Disrupting			Intact
	Mean	SEM		Mean	SEM		Mean	SEM
dome-MESO>	56.75	2.75		32.25	3.2		10.5	3.97
dome-MESO>lat RNAi	17.5	4		50.2	11.5		32.2	14.4
