# Supplementary material for: Reactive oxygen species-dependent Toll/NF-κB activation in the Drosophila hematopoietic niche confers resistance to wasp parasitism
Source: eLife journal article supplement (doi:10.7554/elife.25496), 2017-10-30
Supplement: supp [file elife-25496-supp-v1.zip › elife_poa_e25496_Figure_2_source_data_4.xlsx]

## Sheet: Feuil1
wasp egg hatching
	dome-MESO>	dome-MESO>lat KD	antp>	antp>lat KD
	0	90	18	0
	0	75	19	23
	14	100	12	19
	19	89	0	0
	0	90	6	6
	32	75
mean	10.8333	86.5	11	9.6
SEM	5.406	3.99	3.606	4.823
