# Supplementary material for: Reactive oxygen species-dependent Toll/NF-κB activation in the Drosophila hematopoietic niche confers resistance to wasp parasitism
Source: eLife journal article supplement (doi:10.7554/elife.25496), 2017-10-30
Supplement: supp [file elife-25496-supp-v1.zip › elife_poa_e25496_Figure_3_source_data_1.xlsx]

## Sheet: Feuil1
no para.	6H post para.
20.981	31.021
101.573	75.56
140.024	137.747
140.024	120.988
14.903	128.584
82.588	90.596
93.534	20.596
56.902	89.048
137.805	169.813
129.846	239.933
118.398	124.571
115.707	133.779
12.868	201.089
35.934	211.425
97.812	155.973
