# Supplementary material for: Reactive oxygen species-dependent Toll/NF-κB activation in the Drosophila hematopoietic niche confers resistance to wasp parasitism
Source: eLife journal article supplement (doi:10.7554/elife.25496), 2017-10-30
Supplement: supp [file elife-25496-supp-v1.zip › elife_poa_e25496_Figure_3_source_data_2.xlsx]

## Sheet: Feuil1
no para.	6H post para.
161.222	225.951
214.817	205.067
146.632	142.854
196.719	132.111
142.23	211.598
	188.756
	153.739
	150.249
