# Supplementary material for: Reactive oxygen species-dependent Toll/NF-κB activation in the Drosophila hematopoietic niche confers resistance to wasp parasitism
Source: eLife journal article supplement (doi:10.7554/elife.25496), 2017-10-30
Supplement: supp [file elife-25496-supp-v1.zip › elife_poa_e25496_Figure_4_source_data_1.xlsx]

## Sheet: Feuil1
	dispersed		dispersing		intact
	Mean	SEM	Mean	SEM	Mean	SEM
col>	80.31	2.8	15.84	3.7	3.85	3.8
col>Dif RNAi	36.44	12.33	30.69	6.86	32.88	7.9
col>MyD88 RNAi	33.125	9.1	50.75	12	16.125	8.5
col>pll RNAi	20	10	70	0	10	10
