# Supplementary material for: Reactive oxygen species-dependent Toll/NF-κB activation in the Drosophila hematopoietic niche confers resistance to wasp parasitism
Source: eLife journal article supplement (doi:10.7554/elife.25496), 2017-10-30
Supplement: supp [file elife-25496-supp-v1.zip › elife_poa_e25496_Figure_4_source_data_2.xlsx]

## Sheet: Feuil1
Wasp egg hatching (%)
	col>	col>myd88 KD	col>dif KD
	30	53	81
	25	100	94
	16	73
	25	67	60
	0	41	100
	29	61
	25	92	80
mean	21.4286	69.5714	83
SEM	3.9	7.9	6.9
