# Supplementary material for: Reactive oxygen species-dependent Toll/NF-κB activation in the Drosophila hematopoietic niche confers resistance to wasp parasitism
Source: eLife journal article supplement (doi:10.7554/elife.25496), 2017-10-30
Supplement: supp [file elife-25496-supp-v1.zip › elife_poa_e25496_Figure_5_figure_supplement_1_source_data_1.xlsx]

## Sheet: Feuil1
	col>	ModSP1	Psh1	Psh1;ModSP1
Wasp egg hatching (%)	50	37	78	82
	43	25	96	83.4
	31		87.5	78
				90
n	104	76	69	75
Mean	41.3	31	87	83.3
SEM	5.5	6	5.2	2.5
