# Supplementary material for: Reactive oxygen species-dependent Toll/NF-κB activation in the Drosophila hematopoietic niche confers resistance to wasp parasitism
Source: eLife journal article supplement (doi:10.7554/elife.25496), 2017-10-30
Supplement: supp [file elife-25496-supp-v1.zip › elife_poa_e25496_Figure_5_source_data_1.xlsx]

## Sheet: Feuil1
	dispersed		dispersing		intact
	Mean	SEM	Mean	SEM	Mean	SEM
wt	72.75	11.6	21.7	6.28	5.56	5.55
spz rm7	6.67	6.66	34.44	16.14	58.89	14.4
