# Supplementary material for: Reactive oxygen species-dependent Toll/NF-κB activation in the Drosophila hematopoietic niche confers resistance to wasp parasitism
Source: eLife journal article supplement (doi:10.7554/elife.25496), 2017-10-30
Supplement: supp [file elife-25496-supp-v1.zip › elife_poa_e25496_Figure_5_source_data_2.xlsx]

## Sheet: Feuil1
	dispersed		dispersing		intact
	Mean	SEM	Mean	SEM	Mean	SEM
wt	79.8	10	20.2	10.25	0	0
col>SPE RNAi	5.71	2.97	35.24	8.66	59.05	5.8
