# Supplementary material for: Reactive oxygen species-dependent Toll/NF-κB activation in the Drosophila hematopoietic niche confers resistance to wasp parasitism
Source: eLife journal article supplement (doi:10.7554/elife.25496), 2017-10-30
Supplement: supp [file elife-25496-supp-v1.zip › elife_poa_e25496_Figure_5_source_data_3.xlsx]

## Sheet: Feuil1
	Disrupted			Disrupting			Intact
	Mean	SEM		Mean	SEM		Mean	SEM
dome>wt	84.25	11.8		8.25	8.25		7.5	4.4
dome>SPE RNAi	69.75	5.67		8.5	2.95		21	6.67
