# Supplementary material for: Reactive oxygen species-dependent Toll/NF-κB activation in the Drosophila hematopoietic niche confers resistance to wasp parasitism
Source: eLife journal article supplement (doi:10.7554/elife.25496), 2017-10-30
Supplement: supp [file elife-25496-supp-v1.zip › elife_poa_e25496_Figure_6_source_data_1.xlsx]

## Sheet: Feuil1
in PSC:			in MZ:
	no parasitism	6H post parasitism		no parasitism	6H post parasitism
	32.268	66.492		73.383	120.138
	28.651	37.217		48.961	113.268
	12.405	100.385		31.532	187.107
	14.056	198.07		27.274	202.319
	20.909	49.015		42.752	77.016
	16.475	38.01		47.955	65.536
	16.982	147.668		65.856	190.449
	22.049	154.562		38.568	213.638
	26.495	44.621		50.205	50.773
	22.578	66.676		36.904	94.404
	27.676	49.173		102.658	63.419
	28.067	47.469		58.542	54.068
