# Supplementary material for: Reactive oxygen species-dependent Toll/NF-κB activation in the Drosophila hematopoietic niche confers resistance to wasp parasitism
Source: eLife journal article supplement (doi:10.7554/elife.25496), 2017-10-30
Supplement: supp [file elife-25496-supp-v1.zip › elife_poa_e25496_Figure_6_source_data_2.xlsx]

## Sheet: Feuil1
col> no para.	col> 6H post para.	col>catalase 6H post para.
71.602	119.014	69.027
97.108	187.602	11.837
75.643	176.586	37.859
68.691	183.265	62.19
96.5	70.326	26.073
36.569	141.674	61.426
29.515	80.827	32.222
68.911	104.384	26.361
95.359	71.215	91.83
111.579	81.088	138.35
72.198	64.754	63.811
36.106		29.041
59.746		64.267
51.52		179.258
76.234		165.367
70.731		48.436
124.76		27.153
61.976		55.461
30.453		27.187
41.318
89.079
45.166
