# Supplementary material for: Reactive oxygen species-dependent Toll/NF-κB activation in the Drosophila hematopoietic niche confers resistance to wasp parasitism
Source: eLife journal article supplement (doi:10.7554/elife.25496), 2017-10-30
Supplement: supp [file elife-25496-supp-v1.zip › elife_poa_e25496_Figure_6_source_data_3.xlsx]

## Sheet: Feuil1
	dispersed		dispersing		intact
	Mean	SEM	Mean	SEM	Mean	SEM
wt	66.98	10.67	20.52	7.6	12.5	12.5
col>catalase	2.08	2	16.48	9	81.44	10.8
col>catalase>Toll10B	34.13	9.6	65.87	9.65	0	0
