# Supplementary material for: Reactive oxygen species-dependent Toll/NF-κB activation in the Drosophila hematopoietic niche confers resistance to wasp parasitism
Source: eLife journal article supplement (doi:10.7554/elife.25496), 2017-10-30
Supplement: supp [file elife-25496-supp-v1.zip › elife_poa_e25496_Figure_6_source_data_4.xlsx]

## Sheet: Feuil1
	disrupted	mean	SEM	disrupting	mean	SEM	Intact	mean	SEM
domeless DCR X wt	57	66.7	5.6	28.6	19.97	6	14.3	13.1	7.2
	66.7			8.3			25
	76.4			23			0
domeless DCR X catalase	33.33	34.4433	6.9	48	41.8667	5.1	18.5	23.5	3.8
	47			31.6			21
	23			46			31
