# Supplementary material for: Reactive oxygen species-dependent Toll/NF-κB activation in the Drosophila hematopoietic niche confers resistance to wasp parasitism
Source: eLife journal article supplement (doi:10.7554/elife.25496), 2017-10-30
Supplement: supp [file elife-25496-supp-v1.zip › elife_poa_e25496_Figure_6_source_data_5.xlsx]

## Sheet: Feuil1
Wasp egg hatching (%)
	col>	col>catalase			domeless>	domeless> catalase
	25	100			28	64
	16	100			25	86
	20	69			31	100
mean	20	89.6			28	83
SEM	2.6	10.3			1.7	10.4
