# Supplementary material for: Reactive oxygen species-dependent Toll/NF-κB activation in the Drosophila hematopoietic niche confers resistance to wasp parasitism
Source: eLife journal article supplement (doi:10.7554/elife.25496), 2017-10-30
Supplement: supp [file elife-25496-supp-v1.zip › elife_poa_e25496_Figure_7_source_data_1.xlsx]

## Sheet: Feuil1
	dispersed		dispersing		intact
	Mean	SEM	Mean		Mean
antp>	86.13	0.98	13.87	0.98	0	0
antp>Spi RNAi	45.2	2	49.12	1.9	5.68	0.2
