# Supplementary material for: Reactive oxygen species-dependent Toll/NF-κB activation in the Drosophila hematopoietic niche confers resistance to wasp parasitism
Source: eLife journal article supplement (doi:10.7554/elife.25496), 2017-10-30
Supplement: supp [file elife-25496-supp-v1.zip › elife_poa_e25496_Figure_7_source_data_2.xlsx]

## Sheet: Feuil1
	dispersed		dispersing		intact
	Mean	SEM	mean		Mean
dome-MESO>	96.43	3.57	3.57	3.57	0	0
dome-MESO>EgfrDN	25.1	2.46	44.27	13.51	30.63	11.23
