# Supplementary material for: Reactive oxygen species-dependent Toll/NF-κB activation in the Drosophila hematopoietic niche confers resistance to wasp parasitism
Source: eLife journal article supplement (doi:10.7554/elife.25496), 2017-10-30
Supplement: supp [file elife-25496-supp-v1.zip › elife_poa_e25496_Figure_7_source_data_3.xlsx]

## Sheet: Feuil1
	dispersed		dispersing		intact
	Mean	SEM	Mean		Mean
col>	78.66	7.8	15.28	2.6	6.06	6.06
col>cact	25.23	7.085	66.76	5.55	8.01	1.55
col>cact>sSpi	20.24	6.62	66.07	2.7	13.69	8.2
