# Supplementary figures and images for: Reactive oxygen species-dependent Toll/NF-κB activation in the Drosophila hematopoietic niche confers resistance to wasp parasitism
Source: eLife journal article supplement (doi:10.7554/elife.25496), 2017-10-30

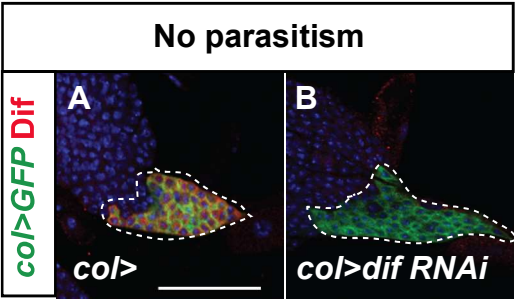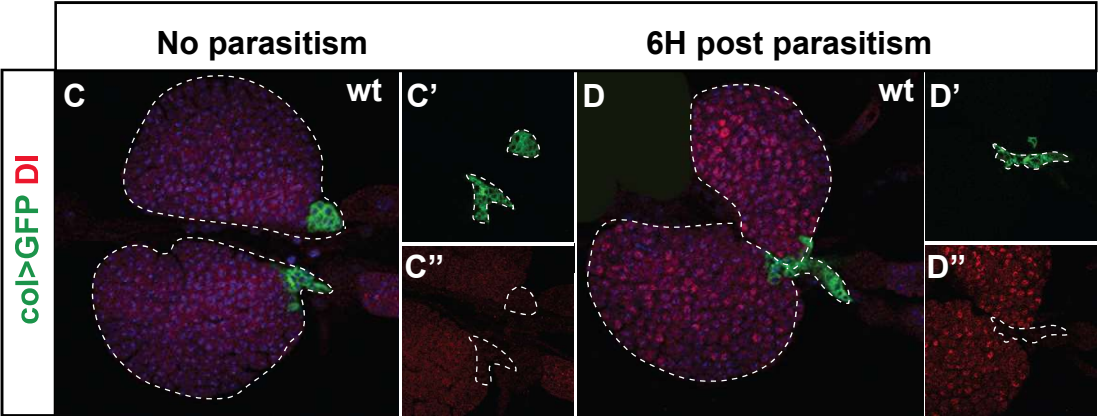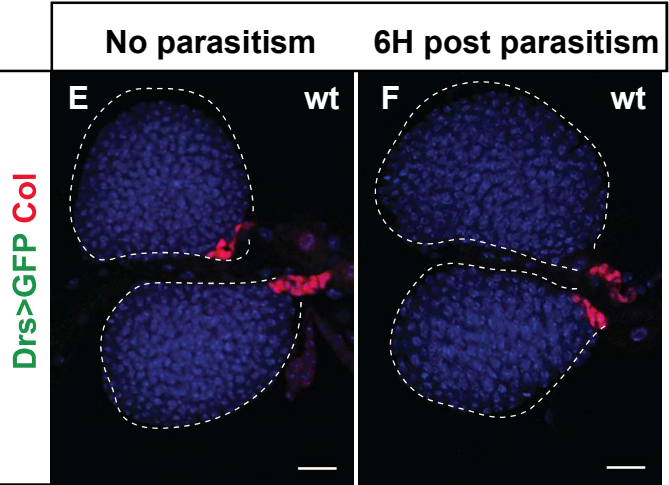

Figure 3-figure supplement 1

Supplement: supp [file elife-25496-supp-v1.zip]

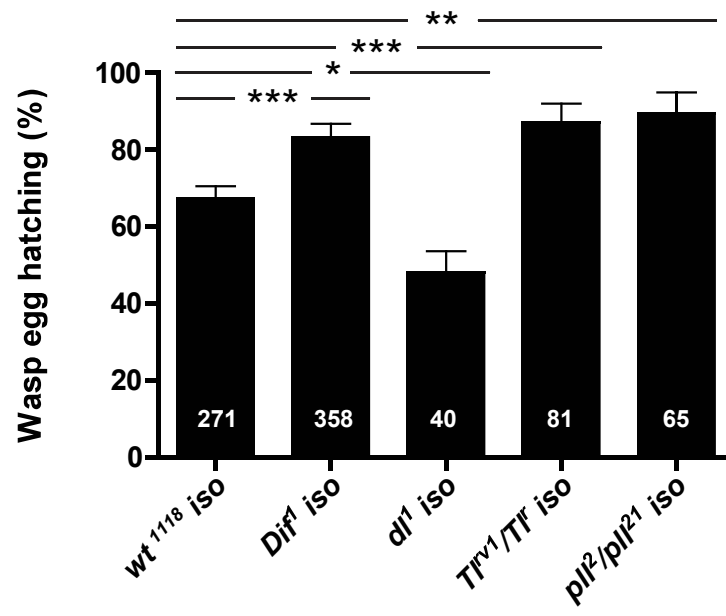

Figure 2-figure supplement 1

Supplement: supp [file elife-25496-supp-v1.zip]

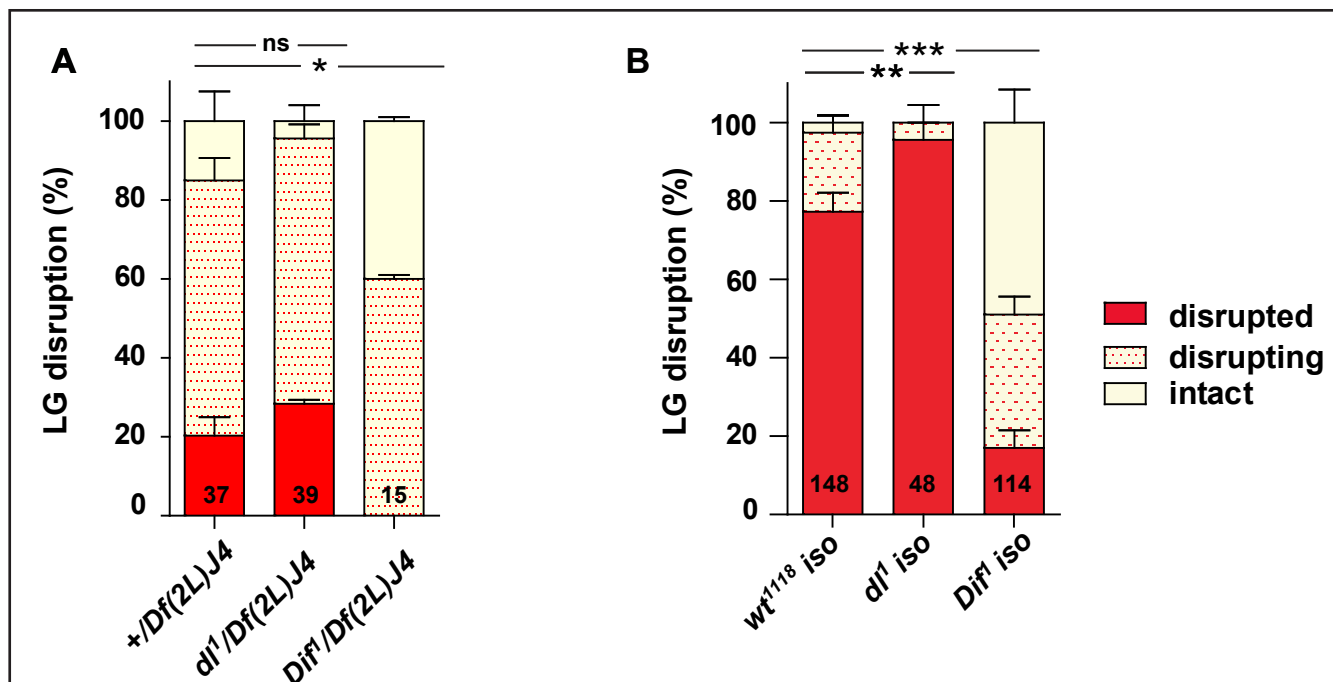

Figure 1-figure supplement 1

Supplement: supp [file elife-25496-supp-v1.zip]

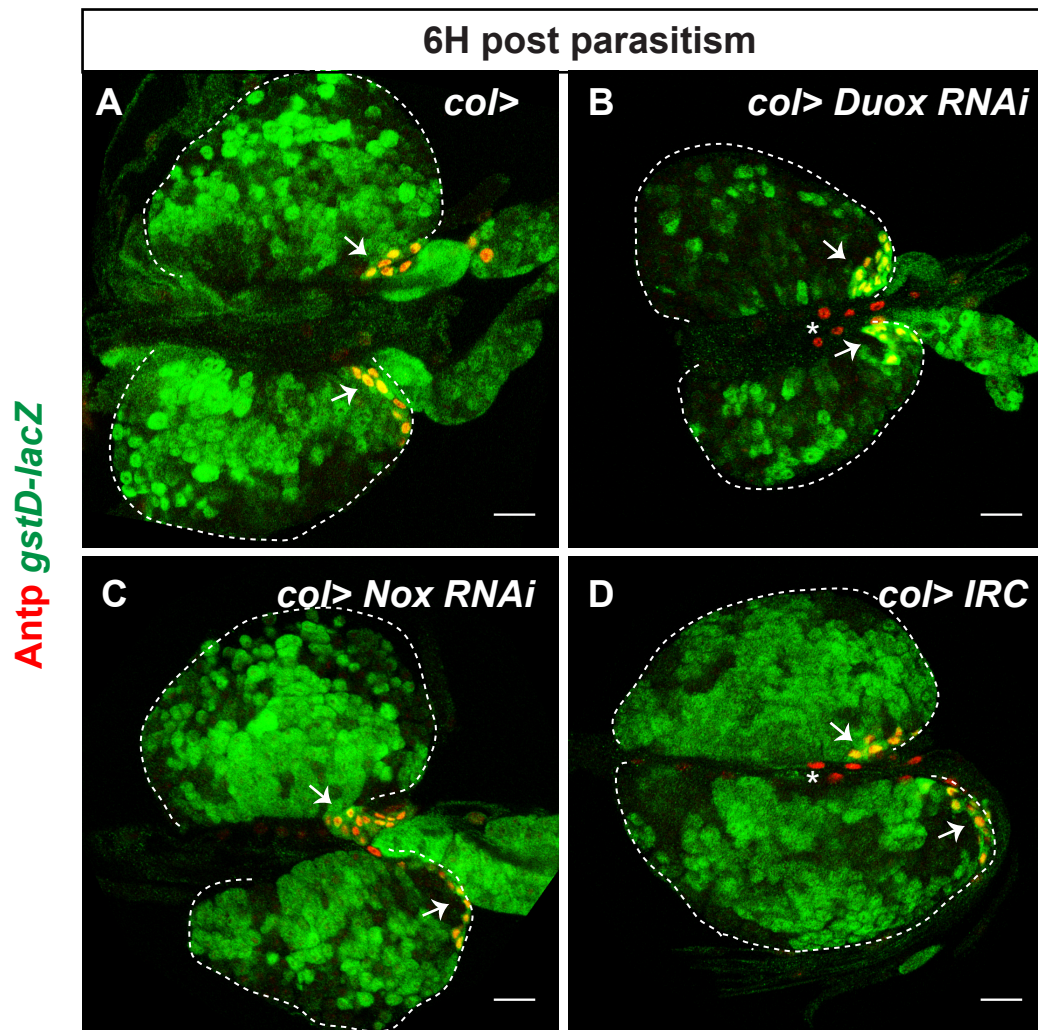

Figure 6-figure supplement 1

Supplement: supp [file elife-25496-supp-v1.zip]

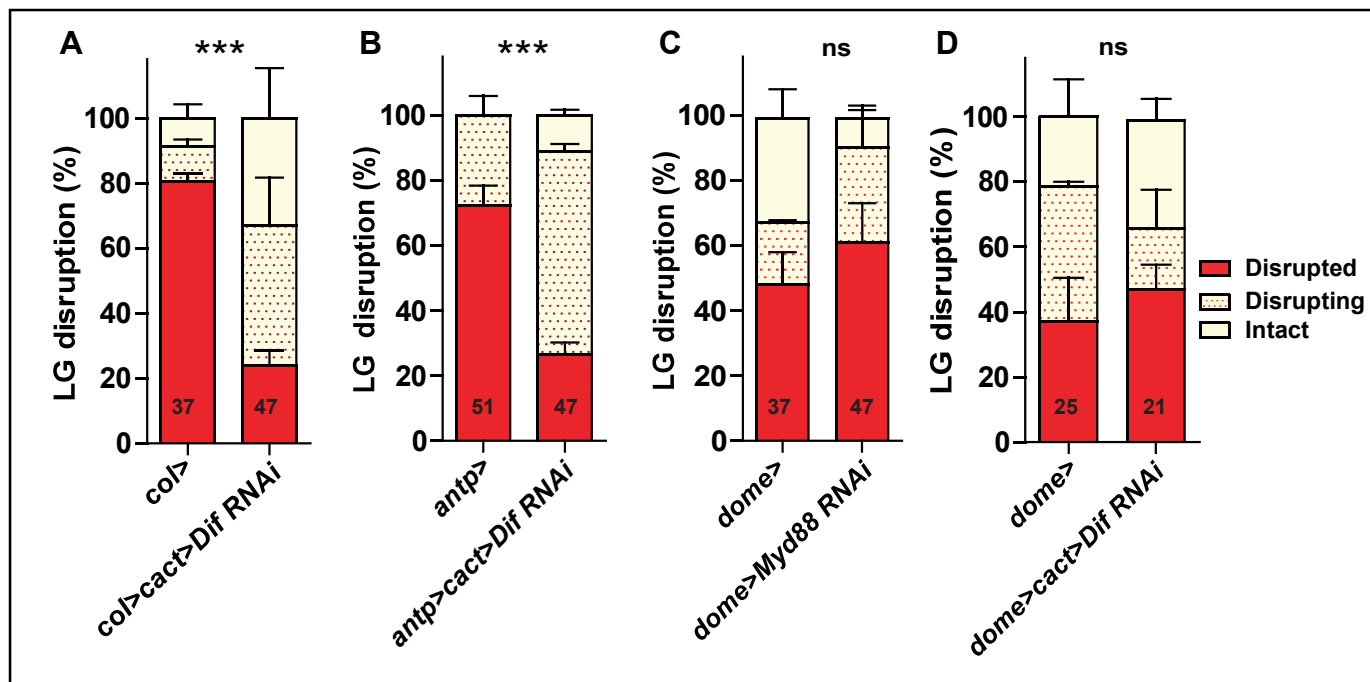

Figure 4-figure supplement 1

Supplement: supp [file elife-25496-supp-v1.zip]

$\beta$  Integrin

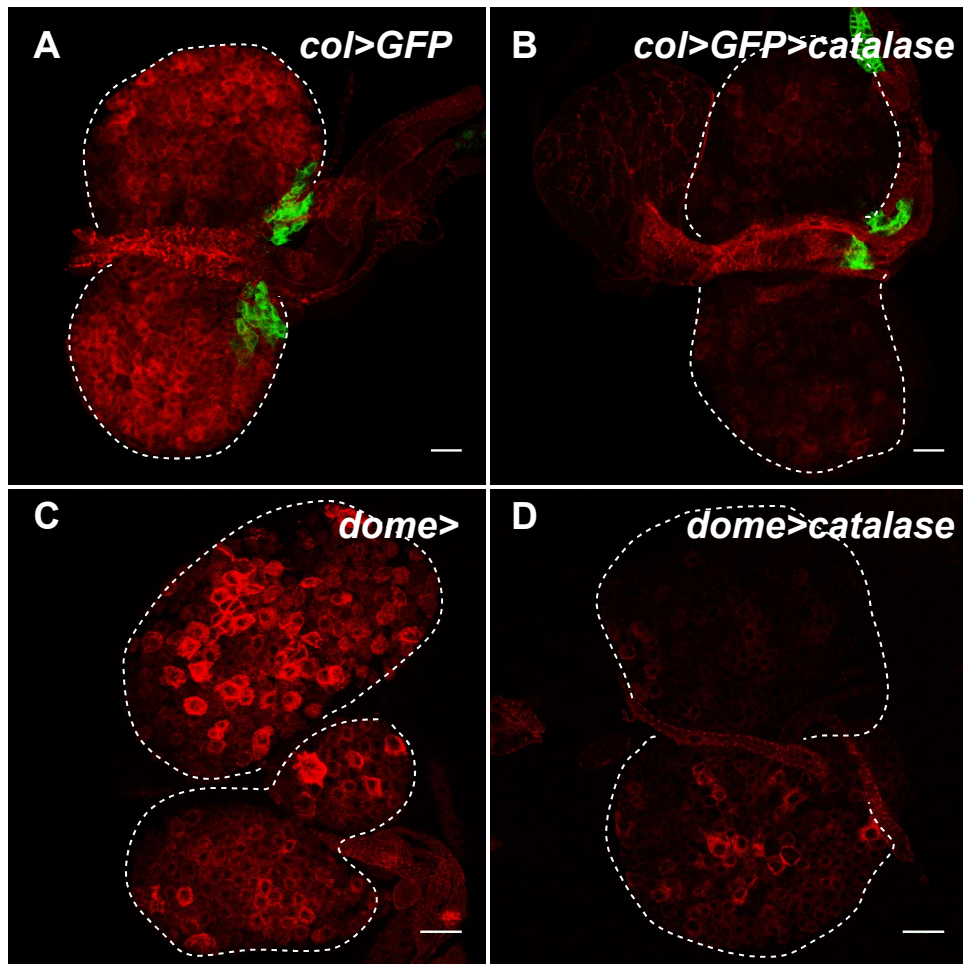

Figure 6-figure supplement 2

Supplement: supp [file elife-25496-supp-v1.zip]

$\beta$  Integrin

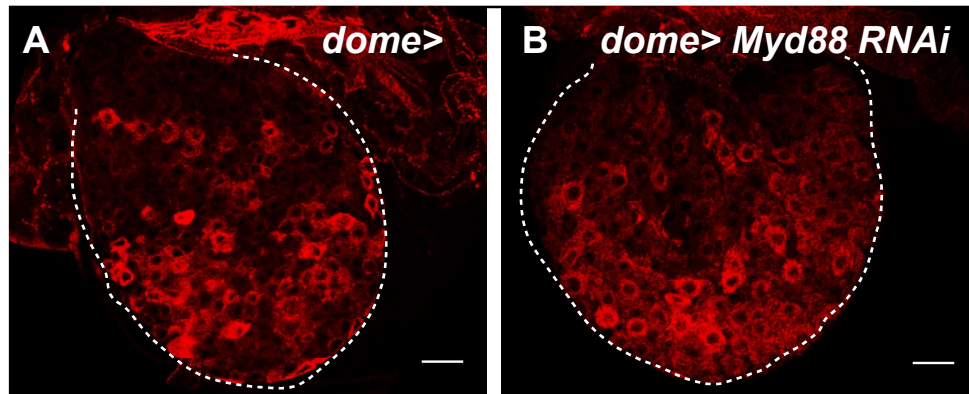

Figure 4-figure supplement 2

Supplement: supp [file elife-25496-supp-v1.zip]

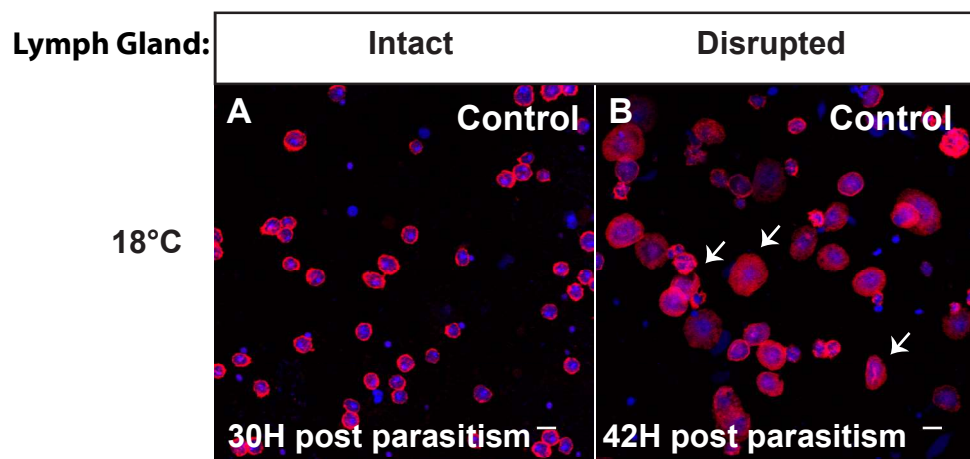

Figure 2-figure supplement 2

Supplement: supp [file elife-25496-supp-v1.zip]

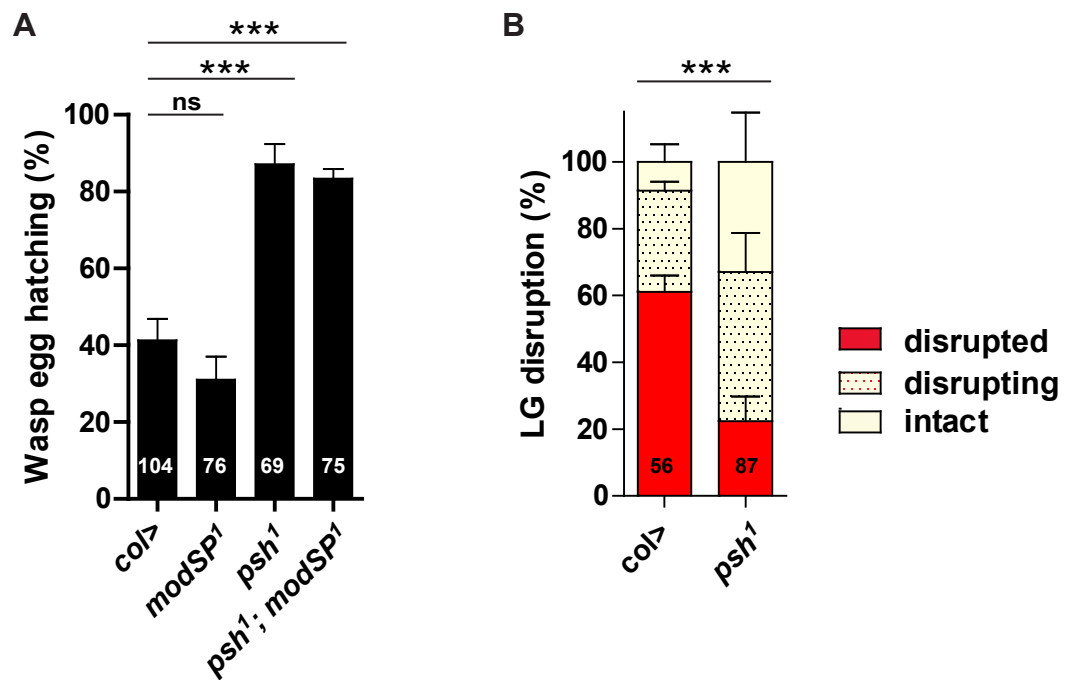

Figure 5-figure supplement 1

Supplement: supp [file elife-25496-supp-v1.zip]

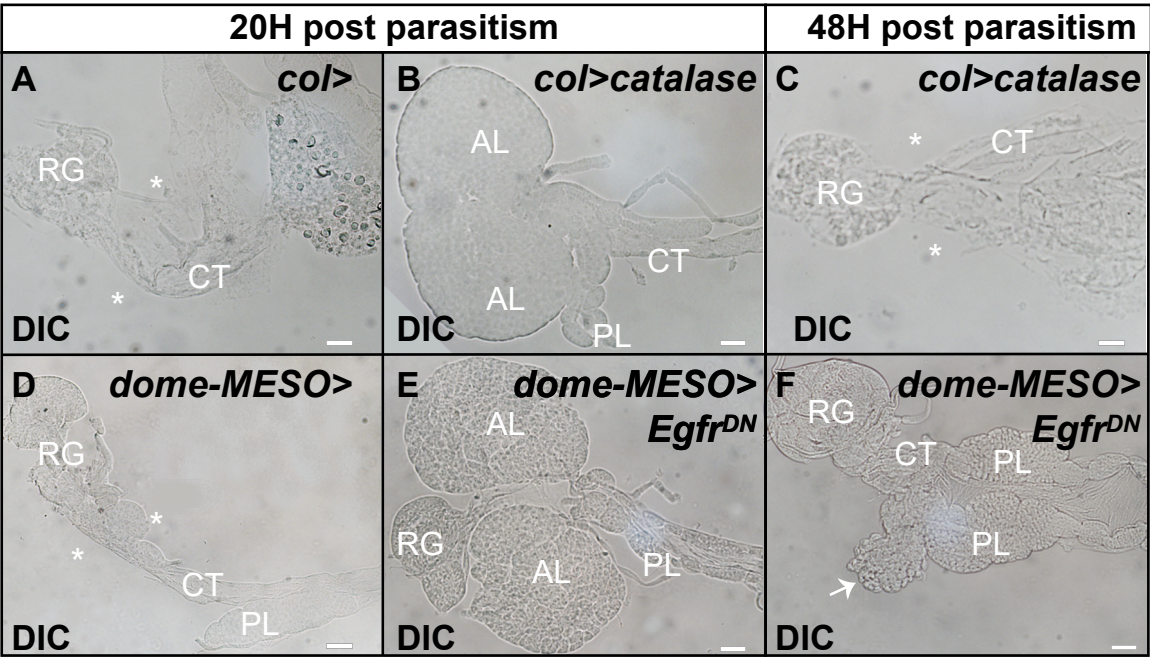

Figure 6-figure supplement 3

Supplement: supp [file elife-25496-supp-v1.zip › elife_poa_e25496_Figure_6_figure_supplement_3.pdf]
